# Supplementary material
Source: publisher site journal article supplement (https://www.spandidos-publications.com/5383/downloadSupplementary)

Figure S1. Receiver operating characteristic curves of continuous variables including age, BMI, preoperative NLR, operative time, intraoperative blood loss and tumor diameter. BMI, body mass index; NLR, neutrophil/lymphocyte ratio.

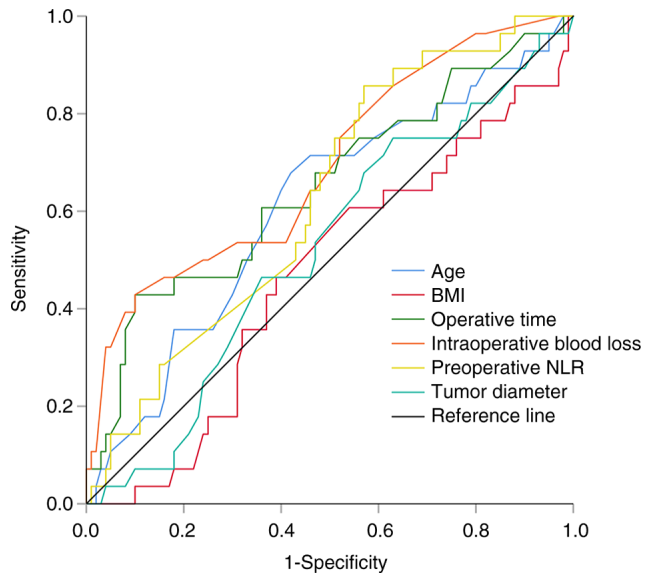

Supplement: Supplementary file 1 [file downloadSupplementary]
